1 **Early Treatment with Hydroxychloroquine and Azithromycin: A ‘Real-World’**

2 **Monocentric Retrospective Cohort Study of 30,423 COVID-19 Patients**

3 Matthieu MILLION<sup>1,2,3\*</sup>, Sébastien CORTAREDONA<sup>2,3,4\*</sup>, Léa DELORME<sup>2,3,4</sup>, Philippe  
4 COLSON<sup>1,2,3</sup>, Anthony LEVASSEUR<sup>1,2,3</sup>, Hervé TISSOT-DUPONT<sup>1,2,3</sup>, Nadim CASSIR<sup>1,2,3</sup>,  
5 Karim BENDAMARDJI<sup>1,3</sup>, Salima LAHOUEL<sup>1,3</sup>, Bernard LA SCOLA<sup>1,2,3</sup>, Laurence  
6 CAMOIN-JAU<sup>1,2,5</sup>, Florence FENOLLAR<sup>2,3,4</sup>, Philippe GAUTRET<sup>2,3,4</sup>, Philippe  
7 PAROLA<sup>2,3,4</sup>, Jean-Christophe LAGIER<sup>1,2,3</sup>, Stéphanie GENTILE<sup>6,7</sup>, Philippe BROUQUI<sup>1,2,3</sup>,  
8 Didier RAOULT<sup>1,2,3</sup>

9 \*Co-first authors

10 **Corresponding author:** Didier RAOULT, [Didier.raoult@gmail.com](mailto:Didier.raoult@gmail.com)

11 **Alternate corresponding author:** Matthieu MILLION, [matthieumillion@gmail.com](mailto:matthieumillion@gmail.com)

12 IHU-Méditerranée Infection, MEPHI, Aix Marseille Université, 19-21 Boulevard Jean

13 Moulin, 13005 Marseille; Phone: (33) 4 13 73 24 01; Fax: (33) 4 13 73 24 02

14 **Affiliations**

- 15 1. Institut Hospitalo-Universitaire Méditerranée Infection, Marseille, France.
- 16 2. Aix-Marseille Université, Institut de Recherche pour le Développement (IRD), UMR  
17 Microbes Evolution Phylogeny and Infections (MEPHI), Marseille, France.
- 18 3. Assistance Publique Hôpitaux de Marseille (APHM), Marseille, France.
- 19 4. Aix Marseille Université, Institut de Recherche pour le Développement (IRD), Service  
20 de Santé des Armées, AP-HM, UMR Vecteurs Infections Tropicales et  
21 Méditerranéennes (VITROME), Marseille, France.
- 22 5. Haematology Laboratory, Hôpital de la Timone, APHM, Marseille, France.
- 23 6. Equipe de Recherche EA 3279 "Santé Publique, Maladies Chroniques et Qualité de  
24 Vie", Faculté de Médecine, Aix Marseille University, 13005 Marseille, France.

25        7. Service d'Evaluation Médicale, Assistance Publique-Hôpitaux de Marseille, 13005

26        Marseille, France.

27

28       The authors have withdrawn this manuscript because analytic strategies for this project  
29       have changed. Therefore, the authors do not wish this work to be cited as reference for the  
30       project.
